# Supplementary material
Source: publisher figshare collection journal article supplement (https://acs.figshare.com/ndownloader/files/5152300)
Supplement: Supplementary file 1 [file 5152300]

## Supporting Information

### Photoinduced Charge-Separation and Charge-Recombination of Oligothiophene-Viologen Dyads in Polar Solvent

Yasuyuki Araki,<sup>†</sup> Hongxia Luo,<sup>†</sup> Takumi Nakamura,<sup>†</sup> Mamoru Fujitsuka,<sup>†,‡</sup> Osamu  
Ito,<sup>†,\*</sup> Hiroki Kanato,<sup>‡</sup> Yoshio Aso,<sup>‡,‡</sup> and Tetsuo Otsubo,<sup>‡,\*</sup>

*Institute of Multidisciplinary Research for Advanced Materials, Tohoku University,  
Katahira, Aoba-ku, Sendai, 980-8577 Japan and Department of Applied Chemistry,  
Faculty of Engineering, Hiroshima University, Higashi-hiroshima, 739-8527, Japan*

*Received April 14, 2004*

---

Author for correspondence. E-mail: ito@tagen.tohoku.ac.jp.

E-mail: otsubo@hiroshima-u.ac.jp

<sup>†</sup>Tohoku University.

<sup>‡</sup>Hiroshima University.

<sup>‡</sup> Present address: Institute of Science and Industrial Research, Osaka University, Osaka,  
Japan.

**General.** All chemicals are of reagent grade. Melting points are uncorrected. <sup>1</sup>H-NMR spectra were measured on a JEOL Lambda 400 spectrometer using deuteriochloroform or deuteriodimethyl sulfoxide as solvent and tetramethylsilane as internal standard. MS spectra were recorded on a Shimadzu KOMPACT-MALDI PROBE spectrometer using a dithranol matrix.

**5-(3-Chloropropyl)-3,3''-dihexyl-2,2';5',2'';5'',2'''-quaterthiophene (2a).** Into a stirred solution of 3,3''-dihexyl-2,2';5',2'';5'',2'''-quaterthiophene<sup>RS1</sup> (**1a**, 3.4 g, 6.8 mmol) in tetrahydrofuran (35 mL) cooled at -40 °C was dropwise added a hexane solution of butyllithium (1.59 N, 3.5 mL, 5.6 mmol) over a period of 0.5 h under a nitrogen atmosphere. The mixture was stirred at 0 °C for 0.5 h and cooled to -30 °C. After 1-bromo-3-chloropropane (1.7 mL, 17 mmol) was added, the mixture was stirred at RT for 5 h, treated with water (50 mL) with ice-cooling, and extracted with hexane (30 mL x 3). The extract was washed with water and dried on anhyd. magnesium sulfate. After evaporation of the solvent, the residue was purified by column chromatography (silica gel, 9:1 hexane-dichloromethane, R<sub>f</sub> 0.3) to give a yellow oil (1.7 g, 52%): <sup>1</sup>H-NMR (400 MHz, CDCl<sub>3</sub>) δ 0.87-0.88 (m, 6H), 1.30-1.37 (m, 12H), 1.60-1.66 (m, 4H), 2.13 (quint, *J* = 7.0 Hz, 2H), 2.71 (t, *J* = 8.3 Hz, 2H), 2.77 (t, *J* = 8.0 Hz, 2H), 2.93 (t, *J* = 6.8 Hz, 2H), 3.60 (t, *J* = 6.3 Hz, 2H), 6.67 (s, 1H), 6.94 (d, *J* = 5.1 Hz, 1H), 6.96 (d, *J* = 3.7 Hz, 1H), 7.10 (d, *J* = 3.6 Hz, 1H), 7.11 (d, *J* = 3.9 Hz, 1H), 7.17 (d, *J* = 5.4 Hz, 1H); MS (MALDI-TOF) *m/z* 573.3 (M<sup>+</sup>); Anal. Calcd for C<sub>31</sub>H<sub>39</sub>ClS<sub>4</sub>: C, 64.71; H, 6.83%. Found: C, 64.69; H, 6.83%.

RS1 Yamashiro, T.; Aso, Y.; Otsubo, T.; Tang, H.; Harima, Y.; Yamashita, K. *Chem. Lett.* **1999**, 443.

**5-(3-Chloropropyl)-3,3'',4''',3''''-tetrahexyl-2,2';5',2'';5'',2'''',5''''',2'''''';5''''',2''''''-octithiophene (2b).** This compound was obtained in 34% yield from 3,3'',4''',3''''-tetrahexyl- 2,2';5',2'';5'',2'''',5''''',2'''''';5''''',2''''''-octithiophene (**1b**)<sup>RS1</sup> in a similar manner as above-stated: red oil; <sup>1</sup>H-NMR (400 MHz, CDCl<sub>3</sub>) δ 0.87-0.92 (m, 12H), 1.26-1.40 (m, 24H), 1.58-1.69 (m, 8H), 2.14 (quint, *J* = 7.1 Hz, 2H),

2.70-2.81 (m, 8H), 2.95 (t,  $J = 7.1$  Hz, 2H), 3.61 (t,  $J = 6.4$  Hz, 2H), 6.68 (s, 1H), 6.94 (d,  $J = 5.4$  Hz, 1H), 6.97 (d,  $J = 3.9$  Hz, 1H), 7.01 (s, 2H), 7.03 (d,  $J = 3.9$  Hz, 1H), 7.04 (d,  $J = 3.9$  Hz, 2H), 7.05 (d,  $J = 3.9$  Hz, 1H), 7.12 (d,  $J = 3.6$  Hz, 1H), 7.13 (d,  $J = 3.6$  Hz, 1H), 7.14 (d,  $J = 3.9$  Hz, 2H), 7.19 (d,  $J = 5.1$  Hz, 1H); MS (MALDI-TOF)  $m/z$  1069.2 ( $M^+$ ); Anal. Calcd for  $C_{59}H_{71}ClS_8$ : C, 66.09; H, 6.67%. Found: C, 66.04; H, 6.71%.

**3,3'''-Dihexyl-5-(3-iodopropyl)-2,2';5',2'';5'',2'''-quaterthiophene (3a).** A solution of **2a** (1.6 g, 2.8 mmol) and sodium iodide (11 g, 73 mmol) in acetone (180 mL) was refluxed for 24 h. After water (100 mL) was added, the mixture was extracted with hexane (30 mL x 3). The extract was washed with water and dried on anhyd. magnesium sulfate. After evaporation of the solvent, the residue was purified by column chromatography to give a yellow oil (1.8 g, 94%):  $^1H$ -NMR (400 MHz,  $CDCl_3$ )  $\delta$  0.87-0.91 (m, 6H), 1.30-1.38 (m, 12H), 1.59-1.68 (m, 4H), 2.16 (quint,  $J = 7.0$  Hz, 2H), 2.71 (t,  $J = 8.1$  Hz, 2H), 2.77 (t,  $J = 8.1$  Hz, 2H), 2.89 (t,  $J = 6.8$  Hz, 2H), 3.24 (t,  $J = 6.6$  Hz, 2H), 6.68 (s, 1H), 6.94 (d,  $J = 5.1$  Hz, 1H), 6.96 (d,  $J = 3.7$  Hz, 1H), 7.10 (d,  $J = 3.9$  Hz, 1H), 7.11 (d,  $J = 3.9$  Hz, 1H), 7.17 (d,  $J = 5.1$  Hz, 1H); MS (MALDI-TOF)  $m/z$  667.4 ( $M^+$ ); Anal. Calcd for  $C_{31}H_{39}IS_4$ : C, 55.84; H, 5.90%. Found: C, 56.20; H, 5.95%.

**3,3''',4''',3''''-Tetrahexyl-5-(3-iodopropyl)-2,2';5',2'';5'',2'''',5''''',2''''',5''''',2''''''-octithiophene (3b).** This compound was obtained in 90% yield from **2b** in a similar manner as above-stated: red oil;  $^1H$ -NMR (400 MHz,  $CDCl_3$ )  $\delta$  0.87-0.92 (m, 12H), 1.28-1.450 (m, 24H), 1.58-1.69 (m, 8H), 2.16 (quint,  $J = 7.31$  Hz, 2H), 2.710-2.81 (m, 8H), 2.90 (t,  $J = 7.1$  Hz, 2H), 3.61 (t,  $J = 6.4$  Hz, 2H), 6.698 (s, 1H), 6.94 (d,  $J = 5.14$  Hz, 1H), 6.97 (d,  $J = 3.69$  Hz, 1H), 7.01 (s, 2H), 7.03 (d,  $J = 3.9$  Hz, 1H), 7.04 (d,  $J = 3.9$  Hz, 2H), 7.05 (d,  $J = 3.9$  Hz, 1H), 7.12 (d,  $J = 3.6$  Hz, 1H), 7.13 (d,  $J = 3.9$  Hz, 1H), 7.14 (d,  $J = 3.9$  Hz, 2H), 7.19 (d,  $J = 5.41$  Hz, 1H); MS (MALDI-TOF)  $m/z$  1161.3 ( $M^+$ ); Anal. Calcd for  $C_{59}H_{71}IS_8$ : C, 60.09; H, 6.15%. Found: C, 60.95; H, 6.16%.
